# Supplementary material
Source: HighWire-hosted journal article supplement (https://www.cancerbiomed.org/content/j.issn.2095-3941.2024.0159)
Supplement: media-1 [file media-1.pdf]

## Supplementary materials

**Table S1** Data source<sup>a-c</sup> for the age-standardised incidence rates of GC

| Country                  | Incidence             | Registries |
|--------------------------|-----------------------|------------|
| Austria                  | CI5 X–XII (2003–2017) | 3          |
| Australia                | CI5 X–XII (2003–2017) | 9          |
| Canada                   | CI5 X–XII (2003–2017) | 10         |
| China                    | CI5 X–XII (2003–2017) | 10         |
| Colombia                 | CI5 X–XII (2003–2017) | 4          |
| Denmark                  | CI5 X–XII (2003–2017) | 1          |
| France                   | CI5 X–XII (2003–2017) | 12         |
| Germany                  | CI5 X–XII (2003–2017) | 9          |
| India                    | CI5 X–XII (2003–2017) | 9          |
| Iceland                  | CI5 X–XII (2003–2017) | 1          |
| Ireland                  | CI5 X–XII (2003–2017) | 2          |
| Italy                    | CI5 X–XII (2003–2017) | 18         |
| Japan                    | CI5 X–XII (2003–2017) | 4          |
| Korea, Republic of       | CI5 X–XII (2003–2017) | 9          |
| The Netherlands          | CI5 X–XII (2003–2017) | 1          |
| New Zealand              | CI5 X–XII (2003–2017) | 3          |
| Norway                   | CI5 X–XII (2003–2017) | 1          |
| Spain                    | CI5 X–XII (2003–2017) | 9          |
| Switzerland              | CI5 X–XII (2003–2017) | 6          |
| South Africa             | CI5 X–XII (2003–2017) | 1          |
| Türkey                   | CI5 X–XII (2003–2017) | 4          |
| Uganda                   | CI5 X–XII (2003–2017) | 1          |
| United Kingdom           | CI5 X–XII (2003–2017) | 4          |
| United States of America | CI5 X–XII (2003–2017) | 151        |

CI5, Cancer Incidence in Five Continents V.

<sup>a</sup>Forman D, Bray F, Brewster DH, Gombe Mbalawa C, Kohler B, Piñeros M, Steliarova-Foucher E, Swaminathan R and Ferlay J, editors (2014), \*\*Cancer Incidence in Five Continents, Vol. X\*\*, IARC Scientific Publication No. 164. Lyon: International Agency for Research on Cancer.

<sup>b</sup>Bray F, Colombet M, Mery L, Piñeros M, Znaor A, Zanetti R and Ferlay J, editors (2017), Cancer Incidence in Five Continents, Vol. XI (electronic version). Lyon: International Agency for Research on Cancer. Available from: <https://ci5.iarc.who.int>, accessed [7<sup>th</sup>, Feb, 2024].

<sup>c</sup>Bray F, Colombet M, Aitken JF, Bardot A, Eser S, Galceran J, Hagenimana M, Matsuda T, Mery L, Piñeros M, Soerjomataram I, de Vries E, Wiggins C, Won Y-J, Znaor A, and Ferlay J, editors (2023), Cancer Incidence in Five Continents, Vol. XII (IARC CancerBase No. 19). Lyon: International Agency for Research on Cancer. Available from: <https://ci5.iarc.who.int>, accessed [7<sup>th</sup>, Feb, 2024].

**Table S2** Confidence interval of GC by gender and years

| Country                  | Male        |             |             | Female      |             |             |
|--------------------------|-------------|-------------|-------------|-------------|-------------|-------------|
|                          | 2003–2007   | 2008–2012   | 2013–2017   | 2003–2007   | 2008–2012   | 2013–2017   |
| Austria                  | 11.03–12.47 | 9.55–10.67  | 8.12–10.25  | 5.61–6.85   | 4.37–5.60   | 4.47–5.14   |
| Australia                | 5.25–7.64   | 6.60–8.35   | 5.76–7.04   | 2.95–4.10   | 2.58–3.46   | 2.38–3.65   |
| Canada                   | 6.89–8.94   | 5.92–8.54   | 5.14–7.47   | 3.13–4.45   | 2.42–4.07   | 2.53–3.31   |
| China                    | 18.41–66.92 | 14.67–70.51 | 12.42–56.23 | 8.35–32.10  | 6.26–30.86  | 5.47–25.58  |
| Colombia                 | 20.42–29.60 | 16.23–24.07 | 19.38–23.15 | 9.21–14.86  | 8.90–11.37  | 9.63–11.12  |
| Denmark                  | 7.46–7.46   | 6.95–6.95   | 7.07–7.07   | 3.45–3.45   | 3.02–3.02   | 3.31–3.31   |
| France                   | 7.77–10.24  | 7.06–8.85   | 6.46–8.64   | 2.69–4.13   | 2.80–4.25   | 2.70–3.78   |
| Germany                  | 11.54–13.90 | 10.19–11.08 | 9.69–10.36  | 6.19–7.14   | 5.43–5.85   | 5.02–5.29   |
| India                    | 1.46–18.27  | 1.22–16.68  | 1.75–14.18  | 0.55–9.08   | 0.80–7.70   | 1.08–7.08   |
| Iceland                  | 9.18–9.18   | 5.90–5.90   | 5.09–5.09   | 5.01–5.01   | 4.29–4.29   | 3.38–3.38   |
| Ireland                  | 9.89–10.57  | 8.48–10.76  | 7.62–9.96   | 4.73–5.02   | 4.02–5.08   | 3.63–4.82   |
| Italy                    | 12.13–15.69 | 10.95–13.46 | 8.93–11.13  | 6.09–7.77   | 5.57–6.79   | 4.94–6.16   |
| Japan                    | 47.62–69.71 | 50.36–62.68 | 48.38–61.28 | 17.95–24.73 | 18.29–22.35 | 18.13–21.91 |
| Korea, Republic of       | 59.58–66.94 | 58.06–65.53 | 47.25–52.88 | 24.02–27.05 | 22.79–26.67 | 20.08–22.38 |
| The Netherlands          | 9.31–9.31   | 8.24–8.24   | 6.55–6.55   | 4.13–4.13   | 4.02–4.02   | 3.39–3.39   |
| New Zealand              | 8.93–20.23  | 8.20–22.25  | 7.48–15.26  | 4.93–13.55  | 4.52–12.70  | 3.83–11.68  |
| Norway                   | 7.74–7.74   | 6.57–6.57   | 6.09–6.09   | 4.18–4.18   | 3.40–3.40   | 3.04–3.04   |
| Spain                    | 10.38–13.43 | 9.99–12.50  | 8.45–10.90  | 4.60–5.62   | 4.52–5.62   | 4.47–5.29   |
| Switzerland              | 7.02–9.63   | 7.24–8.33   | 7.04–8.40   | 3.66–4.93   | 3.33–4.69   | 3.27–4.22   |
| South Africa             | 0.91–0.91   | 1.29–1.29   | 0.58–0.58   | 0.48–0.48   | 0.73–0.73   | 0.79–0.79   |
| Türkey                   | 10.44–18.59 | 10.43–22.31 | 10.14–17.93 | 4.30–9.92   | 5.76–9.08   | 4.99–7.02   |
| Uganda                   | 7.15–7.15   | 5.73–5.73   | 5.00–5.00   | 5.42–5.42   | 2.85–2.85   | 3.93–3.93   |
| United Kingdom           | 9.30–10.62  | 7.86–9.01   | 6.48–8.07   | 3.91–4.82   | 3.31–4.15   | 2.86–3.64   |
| United States of America | 6.72–7.85   | 6.20–7.00   | 5.95–6.61   | 3.29–3.85   | 3.17–3.66   | 3.12–3.51   |

**Table S3** Confidence interval (< 50 years of age) of GC by gender and years

| Country                  | Male      |           |           | Female    |           |           |
|--------------------------|-----------|-----------|-----------|-----------|-----------|-----------|
|                          | 2003–2007 | 2008–2012 | 2013–2017 | 2003–2007 | 2008–2012 | 2013–2017 |
| Austria                  | 0.84–1.20 | 0.81–1.03 | 0.84–0.96 | 0.62–0.91 | 0.69–0.86 | 0.72–0.98 |
| Australia                | 0.31–0.70 | 0.70–0.97 | 0.47–1.02 | 0.29–0.58 | 0.47–0.57 | 0.34–0.67 |
| Canada                   | 0.48–0.78 | 0.63–1.15 | 0.47–0.77 | 0.46–1.12 | 0.45–1.11 | 0.20–0.59 |
| China                    | 2.10–5.96 | 1.39–5.53 | 0.80–5.45 | 1.71–3.80 | 1.08–4.59 | 1.16–3.58 |
| Colombia                 | 2.59–3.17 | 2.45–3.02 | 2.71–3.12 | 1.39–2.05 | 2.07–2.50 | 2.02–2.57 |
| Denmark                  | 0.85–0.85 | 0.65–0.65 | 0.71–0.71 | 0.56–0.56 | 0.49–0.49 | 0.58–0.58 |
| France                   | 0.78–1.07 | 0.70–1.02 | 0.73–1.07 | 0.42–0.69 | 0.40–0.59 | 0.49–0.73 |
| Germany                  | 1.18–1.48 | 1.02–1.18 | 1.01–1.25 | 0.92–1.10 | 0.77–0.88 | 0.83–0.99 |
| India                    | 0.35–2.90 | 0.45–2.38 | 0.51–1.77 | 0.41–1.42 | 0.41–1.31 | 0.42–1.23 |
| Iceland                  | 0.66–0.66 | 0.53–0.53 | 0.55–0.55 | 0.73–0.73 | 0.45–0.45 | 0.34–0.34 |
| Ireland                  | 0.61–1.01 | 0.48–1.02 | 0.78–1.00 | 0.48–0.64 | 0.62–0.72 | 0.48–0.70 |
| Italy                    | 1.00–1.41 | 1.02–1.31 | 0.83–1.04 | 0.85–1.21 | 0.78–0.99 | 0.67–0.94 |
| Japan                    | 3.90–6.55 | 3.16–4.12 | 2.80–3.51 | 2.89–4.05 | 2.52–3.10 | 2.42–2.94 |
| Korea, Republic of       | 7.74–9.01 | 7.35–8.38 | 5.94–6.78 | 5.78–6.67 | 5.50–6.68 | 5.12–5.80 |
| The Netherlands          | 0.84–0.84 | 0.77–0.77 | 0.68–0.68 | 0.59–0.59 | 0.69–0.69 | 0.57–0.57 |
| New Zealand              | 1.15–2.88 | 1.35–3.40 | 1.05–2.48 | 0.92–3.42 | 1.01–2.88 | 0.90–1.99 |
| Norway                   | 0.55–0.55 | 0.67–0.67 | 0.51–0.51 | 0.58–0.58 | 0.39–0.39 | 0.52–0.52 |
| Spain                    | 1.06–1.42 | 0.93–1.37 | 0.77–0.96 | 0.79–1.06 | 0.63–0.91 | 0.71–0.90 |
| Switzerland              | 0.70–1.12 | 0.83–1.21 | 0.62–1.09 | 0.62–1.15 | 0.52–0.98 | 0.60–1.04 |
| South Africa             | 0.08–0.08 | 0.48–0.48 | 0.00–0.00 | 0.05–0.05 | 0.23–0.23 | 0.07–0.07 |
| Türkey                   | 1.58–3.05 | 1.24–2.66 | 1.46–2.68 | 0.93–2.79 | 1.01–1.89 | 1.31–1.46 |
| Uganda                   | 0.85–0.85 | 0.87–0.87 | 0.72–0.72 | 1.13–1.13 | 0.34–0.34 | 0.49–0.49 |
| United Kingdom           | 0.63–0.76 | 0.59–0.71 | 0.55–0.75 | 0.44–0.54 | 0.43–0.64 | 0.38–0.48 |
| United States of America | 0.78–0.89 | 0.76–0.85 | 0.77–0.86 | 0.55–0.67 | 0.57–0.66 | 0.62–0.72 |

**Table S4** Confidence interval ( $\geq 50$  years of age) of GC by gender and years

| Country                  | Male        |             |             | Female      |             |             |
|--------------------------|-------------|-------------|-------------|-------------|-------------|-------------|
|                          | 2003–2007   | 2008–2012   | 2013–2017   | 2003–2007   | 2008–12     | 2013–17     |
| Austria                  | 9.84–11.61  | 8.66–9.73   | 7.17–9.40   | 4.95–5.98   | 3.51–4.91   | 3.74–4.16   |
| Australia                | 4.90–6.97   | 5.73–7.56   | 5.22–6.10   | 2.61–3.57   | 2.05–2.95   | 2.00–3.02   |
| Canada                   | 6.23–8.32   | 5.21–7.46   | 4.63–6.75   | 2.53–3.48   | 1.66–3.26   | 2.27–2.78   |
| China                    | 16.16–61.11 | 13.12–65.14 | 11.52–50.87 | 6.35–28.59  | 4.94–26.52  | 4.24–22.08  |
| Colombia                 | 17.65–26.61 | 13.74–21.09 | 16.50–20.21 | 7.64–13.00  | 6.44–9.26   | 7.49–8.67   |
| Denmark                  | 6.60–6.60   | 6.30–6.30   | 6.37–6.37   | 2.89–2.89   | 2.53–2.53   | 2.73–2.73   |
| France                   | 6.91–9.25   | 6.31–7.88   | 5.66–7.65   | 2.20–3.50   | 2.36–3.69   | 2.18–3.08   |
| Germany                  | 10.34–12.44 | 9.14–9.92   | 8.57–9.21   | 5.21–6.10   | 4.61–5.02   | 4.08–4.40   |
| India                    | 1.10–15.38  | 0.76–14.32  | 1.22–12.43  | 0.10–7.70   | 0.37–6.41   | 0.63–5.87   |
| Iceland                  | 8.52–8.52   | 5.37–5.37   | 4.55–4.55   | 4.27–4.27   | 3.83–3.83   | 3.04–3.04   |
| Ireland                  | 9.28–9.57   | 8.01–9.74   | 6.83–8.96   | 4.25–4.38   | 3.30–4.46   | 3.14–4.12   |
| Italy                    | 11.06–14.35 | 9.89–12.19  | 8.05–10.14  | 5.15–6.65   | 4.76–5.83   | 4.22–5.27   |
| Japan                    | 43.70–63.17 | 47.11–58.66 | 45.57–57.79 | 15.06–20.69 | 15.76–19.26 | 15.66–19.01 |
| Korea, Republic of       | 51.82–57.96 | 50.67–57.19 | 40.95–46.45 | 18.06–20.56 | 17.27–20.02 | 14.86–16.68 |
| The Netherlands          | 8.46–8.46   | 7.47–7.47   | 5.87–5.87   | 3.54–3.54   | 3.32–3.32   | 2.82–2.82   |
| New Zealand              | 7.73–17.40  | 6.82–18.88  | 6.43–12.78  | 3.82–10.32  | 3.48–9.86   | 2.82–9.80   |
| Norway                   | 7.19–7.19   | 5.89–5.89   | 5.58–5.58   | 3.61–3.61   | 3.01–3.01   | 2.52–2.52   |
| Spain                    | 9.25–12.08  | 8.92–11.27  | 7.60–10.02  | 3.74–4.63   | 3.79–4.80   | 3.70–4.45   |
| Switzerland              | 6.09–8.74   | 6.16–7.36   | 6.06–7.66   | 2.58–4.24   | 2.75–3.77   | 2.53–3.32   |
| South Africa             | 0.83–0.83   | 0.80–0.80   | 0.58–0.58   | 0.43–0.43   | 0.50–0.50   | 0.71–0.71   |
| Türkeu                   | 8.86–15.54  | 9.15–19.68  | 8.66–15.26  | 3.34–7.16   | 4.70–7.25   | 3.65–5.59   |
| Uganda                   | 6.30–6.30   | 4.86–4.86   | 4.28–4.28   | 4.29–4.29   | 2.51–2.51   | 3.44–3.44   |
| United Kingdom           | 8.65–9.87   | 7.21–8.36   | 5.89–7.35   | 3.46–4.29   | 2.86–3.52   | 2.46–3.17   |
| United States of America | 5.93–6.97   | 5.43–6.16   | 5.16–5.77   | 2.73–3.20   | 2.59–3.01   | 2.49–2.80   |

**Table S5** New cases and deaths, age-standardised incidence and mortality rates per 100,000 persons with GC in 2022 by world region

| Region                | Incidence       |                |       |      | Mortality       |                |      |      |
|-----------------------|-----------------|----------------|-------|------|-----------------|----------------|------|------|
|                       | Number of cases | % of all cases | ASR   | M/F  | Number of cases | % of all cases | ASR  | M/F  |
| North America         | 10,253          | 1.06           | 4.13  | 1.66 | 8,996           | 1.36           | 1.70 | 1.75 |
| East Asia             | 7,752           | 0.80           | 16.05 | 2.38 | 6,933           | 1.05           | 9.21 | 2.55 |
| East Africa           | 3,470           | 0.36           | 4.35  | 1.22 | 3,056           | 0.46           | 3.86 | 1.23 |
| Mid-Africa            | 2,020           | 0.21           | 3.82  | 1.13 | 1,710           | 0.26           | 3.40 | 1.12 |
| North Africa          | 9,857           | 1.02           | 4.32  | 1.40 | 8,035           | 1.22           | 3.52 | 1.42 |
| South Africa          | 4,180           | 0.43           | 3.41  | 2.08 | 3,203           | 0.49           | 2.96 | 1.75 |
| West Africa           | 14,886          | 1.54           | 3.67  | 1.19 | 11,662          | 1.77           | 3.34 | 1.19 |
| Caribbean             | 55,313          | 5.71           | 6.40  | 1.90 | 43,030          | 6.52           | 4.80 | 1.86 |
| Central America       | 29,675          | 3.06           | 7.33  | 1.39 | 13,367          | 2.02           | 5.70 | 1.38 |
| Southeast Asia        | 520,975         | 53.78          | 5.03  | 1.86 | 317,919         | 48.16          | 4.10 | 1.93 |
| South Central Asia    | 22,224          | 2.29           | 5.55  | 1.93 | 18,034          | 2.73           | 4.81 | 2.01 |
| West Asia             | 38,798          | 4.00           | 8.29  | 1.90 | 31,712          | 4.80           | 6.71 | 2.14 |
| East Europe           | 109,794         | 11.33          | 11.13 | 2.11 | 94,941          | 14.38          | 7.81 | 2.20 |
| North Europe          | 66,400          | 6.85           | 4.34  | 1.96 | 48,548          | 7.35           | 2.75 | 1.91 |
| South Europe          | 27,339          | 2.82           | 7.22  | 1.89 | 17,042          | 2.58           | 4.73 | 2.02 |
| West Europe           | 30,847          | 3.18           | 5.58  | 2.13 | 22,224          | 3.37           | 3.10 | 2.15 |
| Australia-New Zealand | 11,024          | 1.14           | 5.24  | 1.85 | 7,617           | 1.15           | 2.36 | 1.96 |
| Melanesia             | 3,334           | 0.34           | 7.17  | 1.62 | 1,639           | 0.25           | 5.77 | 1.56 |
| South America         | 540             | 0.06           | 9.10  | 2.09 | 428             | 0.06           | 6.99 | 2.11 |
| Micronesia            | 40              | 0.00           | 6.47  | 1.47 | 28              | 0.00           | 4.60 | 1.34 |
| Polynesia             | 63              | 0.01           | 8.02  | 1.47 | 51              | 0.01           | 6.46 | 1.43 |

ASR, age-standardised rate per 100,000; M:F, male:female ASR ratio.

**Table S6** Age-standardised incidence and mortality rates per 100,000 persons with GC in 2022 by countries and HDI rank

| HDI Rank                             | ASIR  | ASMR  | HDI   |
|--------------------------------------|-------|-------|-------|
| Low human development                |       |       |       |
| Somalia                              | 4.97  | 4.69  | 0.380 |
| South Sudan                          | 4.01  | 3.67  | 0.381 |
| Central African Republic             | 3.51  | 3.20  | 0.387 |
| Chad                                 | 3.00  | 2.74  | 0.394 |
| Niger                                | 3.14  | 3.01  | 0.394 |
| Mali                                 | 14.30 | 13.47 | 0.410 |
| Burundi                              | 5.34  | 4.88  | 0.420 |
| Yemen                                | 5.89  | 5.24  | 0.424 |
| Burkina Faso                         | 3.90  | 3.69  | 0.438 |
| Sierra Leone                         | 2.57  | 2.34  | 0.458 |
| Mozambique                           | 0.81  | 0.76  | 0.461 |
| Afghanistan                          | 11.04 | 10.00 | 0.462 |
| Guinea                               | 4.69  | 4.27  | 0.471 |
| Congo, Democratic People Republic of | 3.85  | 3.44  | 0.481 |
| Guinea-Bissau                        | 5.37  | 4.80  | 0.483 |
| Liberia                              | 4.54  | 4.13  | 0.487 |
| Madagascar                           | 4.41  | 4.02  | 0.487 |
| Ethiopia                             | 3.34  | 3.08  | 0.492 |
| Eritrea                              | 3.02  | 2.94  | 0.493 |
| The Republic of the Gambia           | 2.83  | 2.43  | 0.495 |
| Benin                                | 5.92  | 5.12  | 0.504 |
| Malawi                               | 3.17  | 2.91  | 0.508 |
| Djibouti                             | 2.88  | 2.88  | 0.515 |
| Sudan                                | 2.38  | 2.07  | 0.516 |
| Senegal                              | 7.24  | 6.44  | 0.517 |
| Lesotho                              | 1.71  | 1.45  | 0.521 |
| Tanzania, United Republic of         | 4.19  | 3.65  | 0.532 |
| Côte d'Ivoire                        | 4.77  | 4.33  | 0.534 |
| Pakistan                             | 3.51  | 3.05  | 0.540 |
| Mauritania                           | 5.22  | 4.81  | 0.540 |
| Togo                                 | 5.42  | 4.96  | 0.547 |
| Rwanda                               | 8.19  | 7.36  | 0.548 |
| Nigeria                              | 1.82  | 1.61  | 0.548 |
| Uganda                               | 3.26  | 2.85  | 0.550 |

**Table S6** Continued

| HDI Rank                         | ASIR  | ASMR  | HDI   |
|----------------------------------|-------|-------|-------|
| Zimbabwe                         | 10.33 | 9.08  | 0.550 |
| Haiti                            | 9.86  | 8.46  | 0.552 |
| Syrian Arab Republic             | 4.81  | 4.32  | 0.557 |
| Solomon Islands                  | 2.44  | 2.15  | 0.562 |
| Timor-Leste                      | 3.20  | 2.78  | 0.566 |
| Papua New Guinea                 | 8.10  | 6.64  | 0.568 |
| Zambia                           | 3.89  | 3.39  | 0.569 |
| Comoros                          | 2.10  | 2.10  | 0.586 |
| Cameroon                         | 3.45  | 2.97  | 0.587 |
| Angola                           | 4.53  | 3.96  | 0.591 |
| Congo, Republic of               | 3.39  | 3.12  | 0.593 |
| Cambodia                         | 4.08  | 3.52  | 0.600 |
| Kenya                            | 7.16  | 6.20  | 0.601 |
| Nepal                            | 6.54  | 5.97  | 0.601 |
| Ghana                            | 4.81  | 4.30  | 0.602 |
| Myanmar                          | 11.77 | 10.21 | 0.608 |
| Eswatini                         | 1.33  | 1.33  | 0.610 |
| Namibia                          | 2.47  | 2.20  | 0.610 |
| Sao Tome and Principe            | 11.14 | 11.14 | 0.613 |
| Vanuatu                          | 3.50  | 3.50  | 0.614 |
| Lao People's Democratic Republic | 11.34 | 9.65  | 0.620 |
| Honduras                         | 8.63  | 8.04  | 0.624 |
| Guatemala                        | 12.18 | 10.67 | 0.629 |
| Medium human development         |       |       |       |
| India                            | 4.53  | 4.06  | 0.644 |
| Equatorial Guinea                | 2.67  | 2.42  | 0.650 |
| Cape Verde                       | 5.09  | 4.44  | 0.661 |
| Nicaragua                        | 9.08  | 7.84  | 0.669 |
| Bangladesh                       | 5.45  | 4.84  | 0.670 |
| Iraq                             | 5.02  | 4.25  | 0.673 |
| El Salvador                      | 8.24  | 7.03  | 0.674 |
| Tajikistan                       | 19.43 | 16.73 | 0.679 |
| Bhutan                           | 15.87 | 14.20 | 0.681 |
| Suriname                         | 4.57  | 3.54  | 0.690 |
| Gabon                            | 2.42  | 2.23  | 0.693 |
| Morocco                          | 5.45  | 4.79  | 0.698 |

Table S6 Continued

| HDI Rank                 | ASIR  | ASMR  | HDI   |
|--------------------------|-------|-------|-------|
| Bolivia                  | 8.74  | 6.73  | 0.698 |
| Venezuela                | 7.52  | 5.80  | 0.699 |
| Belize                   | 4.81  | 4.27  | 0.700 |
| Kyrgyzstan               | 16.46 | 14.00 | 0.701 |
| Samoa                    | 11.70 | 10.34 | 0.702 |
| Jamaica                  | 6.89  | 5.82  | 0.706 |
| Botswana                 | 1.29  | 1.08  | 0.708 |
| Philippines              | 4.17  | 3.46  | 0.710 |
| Indonesia                | 1.34  | 1.13  | 0.713 |
| Gaza Strip and West Bank | 4.97  | 3.95  | 0.716 |
| South Africa             | 3.58  | 3.12  | 0.717 |
| Lebanon                  | 3.10  | 2.75  | 0.723 |
| Saint Lucia              | 8.64  | 5.90  | 0.725 |
| Viet Nam                 | 13.40 | 10.88 | 0.726 |
| Uzbekistan               | 10.15 | 7.78  | 0.727 |
| Egypt                    | 3.64  | 2.74  | 0.728 |
| Fiji                     | 4.14  | 2.97  | 0.729 |
| Paraguay                 | 6.35  | 4.82  | 0.731 |
| Tunisia                  | 3.51  | 2.98  | 0.732 |
| Ukraine                  | 9.48  | 6.93  | 0.734 |
| Jordan                   | 5.33  | 4.55  | 0.736 |
| Mongolia                 | 35.49 | 31.54 | 0.741 |
| Guyana                   | 4.47  | 3.05  | 0.742 |
| Turkmenistan             | 12.07 | 9.70  | 0.744 |
| Algeria                  | 6.13  | 4.93  | 0.745 |
| Libya                    | 3.82  | 3.50  | 0.746 |
| Colombia                 | 12.90 | 9.87  | 0.758 |
| Brazil                   | 7.55  | 5.87  | 0.760 |
| Azerbaijan               | 16.56 | 12.83 | 0.760 |
| Maldives                 | 0.67  | 0.67  | 0.762 |
| Peru                     | 14.31 | 10.59 | 0.762 |
| Moldova                  | 9.57  | 7.78  | 0.763 |
| High human development   |       |       |       |
| Cuba                     | 5.64  | 3.69  | 0.764 |
| Ecuador                  | 12.75 | 10.15 | 0.765 |
| North Macedonia          | 9.49  | 7.22  | 0.765 |

Table S6 Continued

| HDI Rank                  | ASIR  | ASMR  | HDI   |
|---------------------------|-------|-------|-------|
| Dominican Republic        | 6.20  | 4.68  | 0.766 |
| Bosnia Herzegovina        | 9.61  | 7.28  | 0.779 |
| Iran, Islamic Republic of | 19.37 | 15.41 | 0.780 |
| Sri Lanka                 | 2.55  | 1.93  | 0.780 |
| Mexico                    | 6.29  | 4.74  | 0.781 |
| Armenia                   | 12.10 | 9.12  | 0.786 |
| China                     | 13.72 | 9.39  | 0.788 |
| Albania                   | 12.63 | 9.89  | 0.789 |
| Mauritius                 | 5.72  | 4.07  | 0.796 |
| Bulgaria                  | 9.01  | 6.06  | 0.799 |
| Belarus                   | 15.28 | 11.34 | 0.801 |
| Kazakhstan                | 13.71 | 9.27  | 0.802 |
| Thailand                  | 3.31  | 2.38  | 0.803 |
| Serbia                    | 7.06  | 5.13  | 0.805 |
| Costa Rica                | 13.97 | 9.53  | 0.806 |
| Malaysia                  | 4.13  | 3.28  | 0.807 |
| Barbados                  | 5.00  | 3.73  | 0.809 |
| Trinidad and Tobago       | 3.97  | 2.98  | 0.814 |
| Georgia                   | 9.71  | 7.21  | 0.814 |
| Oman                      | 8.20  | 7.16  | 0.819 |
| Bahamas                   | 7.74  | 6.46  | 0.820 |
| Panama                    | 8.75  | 6.55  | 0.820 |
| Russian Federation        | 13.66 | 9.21  | 0.821 |
| Brunei Darussalam         | 10.35 | 8.14  | 0.823 |
| Romania                   | 8.89  | 7.10  | 0.827 |
| Uruguay                   | 9.22  | 6.10  | 0.830 |
| Montenegro                | 3.94  | 3.25  | 0.844 |
| Kuwait                    | 2.49  | 2.27  | 0.847 |
| Argentina                 | 6.68  | 4.98  | 0.849 |
| Hungary                   | 7.51  | 5.43  | 0.851 |
| Türkey                    | 11.67 | 9.28  | 0.855 |
| Slovakia                  | 6.60  | 5.09  | 0.855 |
| Chile                     | 14.18 | 11.06 | 0.860 |
| Portugal                  | 12.80 | 7.99  | 0.874 |
| Qatar                     | 3.51  | 3.06  | 0.875 |
| Saudi Arabia              | 2.70  | 2.18  | 0.875 |

Table S6 Continued

| HDI Rank                    | ASIR  | ASMR | HDI   |
|-----------------------------|-------|------|-------|
| Croatia                     | 9.38  | 5.77 | 0.878 |
| Latvia                      | 12.11 | 8.27 | 0.879 |
| Lithuania                   | 11.66 | 8.84 | 0.879 |
| Poland                      | 8.13  | 6.03 | 0.881 |
| Bahrain                     | 3.34  | 2.86 | 0.888 |
| Greece                      | 6.28  | 3.80 | 0.893 |
| Czechia                     | 4.81  | 3.37 | 0.895 |
| Estonia                     | 13.09 | 8.78 | 0.899 |
| Very high human development |       |      |       |
| Italy                       | 6.82  | 4.48 | 0.906 |
| Cyprus                      | 6.07  | 4.53 | 0.907 |
| France (metropolitan)       | 4.87  | 2.87 | 0.910 |
| French Polynesia            | 6.75  | 4.93 | 0.910 |
| New Caledonia               | 8.43  | 6.11 | 0.910 |
| France, La Réunion          | 9.83  | 6.34 | 0.910 |
| France, Martinique          | 10.77 | 7.65 | 0.910 |
| France, Guadeloupe          | 12.28 | 8.90 | 0.910 |
| French Guyana               | 8.59  | 6.32 | 0.910 |
| Spain                       | 5.96  | 3.77 | 0.911 |
| Israel                      | 5.84  | 3.49 | 0.915 |
| Malta                       | 5.44  | 3.64 | 0.915 |
| Japan                       | 27.60 | 7.24 | 0.920 |
| Austria                     | 5.43  | 2.98 | 0.926 |
| Slovenia                    | 8.44  | 5.01 | 0.926 |
| United States of America    | 4.07  | 1.62 | 0.927 |
| Puerto Rico                 | 2.78  | 2.44 | 0.927 |
| Guam                        | 6.12  | 4.13 | 0.927 |
| Luxembourg                  | 4.63  | 2.55 | 0.927 |
| Korea, Republic of          | 26.98 | 6.53 | 0.929 |
| Canada                      | 4.65  | 2.36 | 0.935 |
| United Arab Emirates        | 3.85  | 3.35 | 0.937 |
| New Zealand                 | 5.00  | 2.87 | 0.939 |
| United Kingdom              | 3.61  | 2.31 | 0.940 |
| Belgium                     | 5.36  | 2.25 | 0.942 |
| Finland                     | 3.99  | 2.46 | 0.942 |

Table S6 Continued

| HDI Rank                             | ASIR  | ASMR  | HDI   |
|--------------------------------------|-------|-------|-------|
| The Netherlands                      | 4.33  | 2.44  | 0.946 |
| Australia                            | 5.29  | 2.26  | 0.946 |
| Singapore                            | 7.98  | 5.50  | 0.949 |
| Germany                              | 6.43  | 3.55  | 0.950 |
| Ireland                              | 5.30  | 3.06  | 0.950 |
| Sweden                               | 3.64  | 2.04  | 0.952 |
| Denmark                              | 5.34  | 3.28  | 0.952 |
| Iceland                              | 3.29  | 1.73  | 0.959 |
| Norway                               | 4.22  | 2.34  | 0.966 |
| Switzerland                          | 5.09  | 2.77  | 0.967 |
| Country without HDI record           |       |       |       |
| Korea, Democratic People Republic of | 13.91 | 11.41 | -     |
| Human development groups             |       |       |       |
| Low HDI                              | 0.517 | -     | -     |
| Medium HDI                           | 0.640 | -     | -     |
| High HDI                             | 0.764 | -     | -     |
| Very high HDI                        | 0.902 | -     | -     |

ASIR, age-standardised incidence rate per 100,000 people; ASMR, age-standardised mortality rate per 100,000 people; HDI, Human Development Index. Spearman Result between ASIR and HDI (correlation = 0.265,  $P = 0.0002706658148056204$ ,  $P < 0.001$ ); Spearman Result between ASMR and HDI (correlation = 0.012,  $P = 0.8702329088914409$ ).

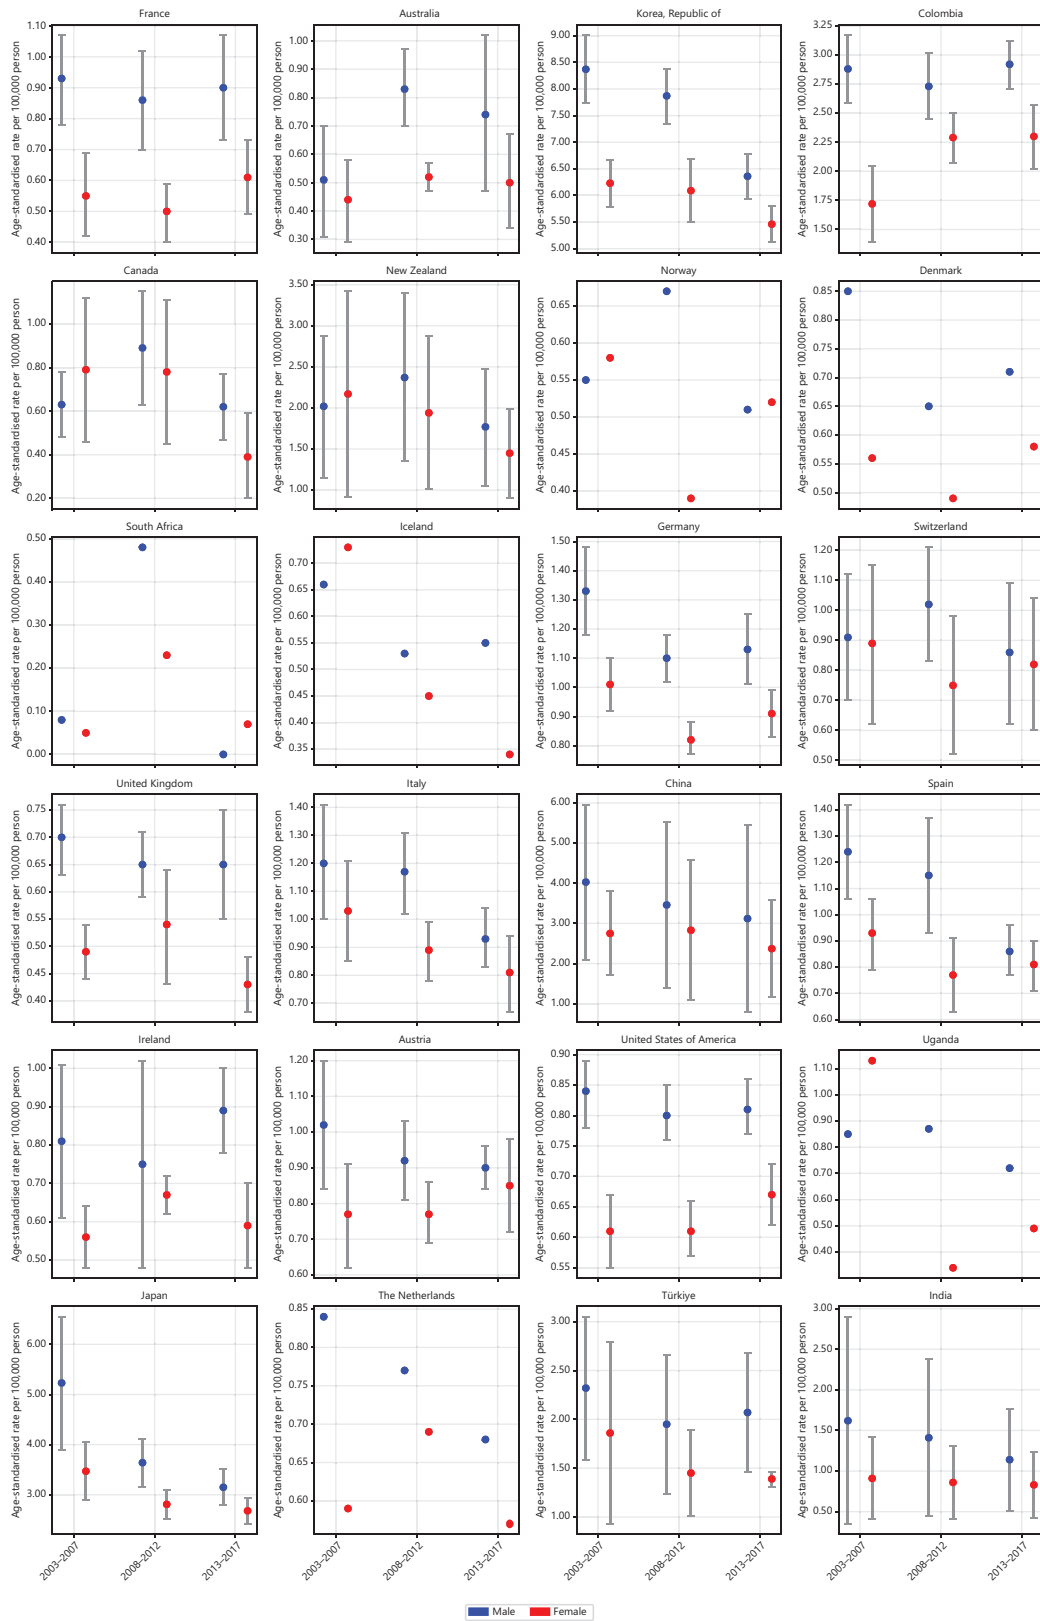

Figure S1 Age-standardised incidence rates per 100,000 person and confidence interval (< 50 years of age) of GC by gender and years.
